# Supplementary material
Source: HighWire-hosted journal article supplement (https://militaryhealth.bmj.com/content/169/4/373)
Supplement: inline-supplementary-material-1 [file inline-supplementary-material-1.pdf]

## Supplementary Material

*SUPPLEMENT 1: Search Concepts and terms for Breastfeeding, Employment, Enablers, Barriers and the Military*

| Breastfeeding Terms                                                                                                                                                                                   |                                          |
|-------------------------------------------------------------------------------------------------------------------------------------------------------------------------------------------------------|------------------------------------------|
| Breast<br>Breastfe*<br>Lactati*<br>"Nursing Mother"<br>Pump*<br>"Breast Milk"<br>Express*                                                                                                             |                                          |
| Employment Terms                                                                                                                                                                                      |                                          |
| Work*<br>Employ*<br>Occupation*<br>Job<br>Profession*<br>"Return to Work"<br>"Maternity Leave"                                                                                                        |                                          |
| Enabler Terms                                                                                                                                                                                         | Barrier Terms                            |
| Enabl*<br>Facilitat*<br>"Support* factor*"<br>Policy<br>Break*<br>Time<br>Room<br>"Private Space"<br>Facility<br>Stor*<br>Fridge<br>Freezer<br>Pump*<br>Equipment<br>"Power Supply"<br>"Cold storage" | Policy<br>Barrier<br>Block*<br>Challeng* |

| <b>Military Terms</b> |
|-----------------------|
| Military              |
| Army                  |
| Armed                 |
| Force*                |
| Navy                  |
| Naval                 |
| “Air Force”           |
| Defence*              |
| Guard                 |
| Soldier               |
| Sailor                |
| Aircrew               |

*SUPPLEMENT 2: Search Concepts and terms for Policies and Guidance***Policy and Guidance Terms**

Policy  
Guid\*  
Recommendation\*  
Instruction  
Memorandum  
Publication  
Directive  
Manual  
Handbook  
Order

*SUPPLEMENT 3: Search Strategy by Database*

| No | CINAHL DATABASE SEARCH                                                                                                                                                                                                  | Hits    |
|----|-------------------------------------------------------------------------------------------------------------------------------------------------------------------------------------------------------------------------|---------|
| 1  | <b>Breastfeeding terms</b><br>Breast AND (Breastfe* OR Lactati* OR "Nursing Mother" OR Pump* OR "Breast Milk" OR Express*)                                                                                              | 18,892  |
| 2  | <b>Employment terms</b><br>Work* OR Employ* OR Occupation* OR Job OR Profession* OR "Return to work" OR "Maternity Leave"                                                                                               | 805,430 |
| 3  | 1 AND 2                                                                                                                                                                                                                 | 2,820   |
| 4  | 3 AND <b>Enabler terms</b><br>Enabl* OR Facilitat* OR "Support* factor*" OR Policy OF Break* OR Time OR Room OR "Private Space" OR Stor* OR Fridge OR Freezer OR Pump* OR Equipment OR "Power Supply" OR "Cold storage" | 1,287   |
| 5  | 3 AND <b>Barrier terms</b><br>Policy OR Barrier OR Block* OR Challeng*                                                                                                                                                  | 656     |
| 6  | 4 OR 5                                                                                                                                                                                                                  | 1,441   |
| 7  | 6 limited to UK                                                                                                                                                                                                         | 154     |
| 8  | 7 limited to Human                                                                                                                                                                                                      | 154     |
| 9  | 8 limited to articles published since 2006                                                                                                                                                                              | 109     |
|    | TOTAL (non-military)                                                                                                                                                                                                    | 109     |
| 10 | <b>Military terms</b><br>Military OR Army OR Armed OR Force* OR Navy OR Naval OR "Air Force" OR Defence* OR Guard OR Soldier OR Sailor OR Aircrew                                                                       | 79,246  |
| 11 | 3 AND 10                                                                                                                                                                                                                | 38      |
| 12 | 6 AND 10                                                                                                                                                                                                                | 1       |
| 13 | 12 limited to Human*                                                                                                                                                                                                    | 1       |
|    | TOTAL (military)                                                                                                                                                                                                        | 1       |
|    | TOTAL (military and non-military)                                                                                                                                                                                       | 110     |

\*Military studies not limited to UK due to lack of data from British Armed Forces, or since 2006 due to limited data from all Armed Forces

| No | PubMed DATABASE SEARCH                                                                                                                                                                                                  | Hits      |
|----|-------------------------------------------------------------------------------------------------------------------------------------------------------------------------------------------------------------------------|-----------|
| 1  | <b>Breastfeeding terms</b><br>Breast AND (Breastfe* OR Lactati* OR "Nursing Mother" OR Pump* OR "Breast Milk" OR Express*)                                                                                              | 107,869   |
| 2  | <b>Employment terms</b><br>Work* OR Employ* OR Occupation* OR Job OR Profession* OR "Return to work" OR "Maternity Leave"                                                                                               | 2,196,146 |
| 3  | 1 AND 2                                                                                                                                                                                                                 | 9,032     |
| 4  | 3 AND <b>Enabler terms</b><br>Enabl* OR Facilitat* OR "Support* factor*" OR Policy OF Break* OR Time OR Room OR "Private Space" OR Stor* OR Fridge OR Freezer OR Pump* OR Equipment OR "Power Supply" OR "Cold storage" | 1,357     |
| 5  | 3 AND <b>Barrier terms</b><br>Policy OR Barrier OR Block* OR Challeng*                                                                                                                                                  | 1,340     |
| 6  | 4 OR 5                                                                                                                                                                                                                  | 3,901     |
| 7  | 6 limited to UK                                                                                                                                                                                                         | 378       |
| 8  | 7 limited to Human                                                                                                                                                                                                      | 326       |
| 9  | 8 limited to articles published since 2006                                                                                                                                                                              | 28        |
|    | TOTAL (non-military)                                                                                                                                                                                                    | 28        |
| 10 | <b>Military terms</b><br>Military OR Army OR Armed OR Force* OR Navy OR Naval OR "Air Force" OR Defence* OR Guard OR Soldier OR Sailor OR Aircrew                                                                       | 621,392   |
| 11 | 3 AND 10                                                                                                                                                                                                                | 218       |
| 12 | 6 AND 10                                                                                                                                                                                                                | 7         |
| 13 | 12 limited to Human*                                                                                                                                                                                                    | 7         |
|    | TOTAL (military)                                                                                                                                                                                                        | 7         |
|    | TOTAL (military and non-military)                                                                                                                                                                                       | 35        |

\*Military studies not limited to UK due to lack of data from British Armed Forces, or since 2006 due to limited data from all Armed Forces

| No | EMBASE DATABASE SEARCH                                                                                                                                                                                                  | Hits      |
|----|-------------------------------------------------------------------------------------------------------------------------------------------------------------------------------------------------------------------------|-----------|
| 1  | <b>Breastfeeding terms</b><br>Breast AND (Breastfe* OR Lactati* OR "Nursing Mother" OR Pump* OR "Breast Milk" OR Express*)                                                                                              | 187,542   |
| 2  | <b>Employment terms</b><br>Work* OR Employ* OR Occupation* OR Job OR Profession* OR "Return to work" OR "Maternity Leave"                                                                                               | 2,775,280 |
| 3  | 1 AND 2                                                                                                                                                                                                                 | 14,858    |
| 4  | 3 AND <b>Enabler terms</b><br>Enabl* OR Facilitat* OR "Support* factor*" OR Policy OF Break* OR Time OR Room OR "Private Space" OR Stor* OR Fridge OR Freezer OR Pump* OR Equipment OR "Power Supply" OR "Cold storage" | 4,924     |
| 5  | 3 AND <b>Barrier terms</b><br>Policy OR Barrier OR Block* OR Challeng*                                                                                                                                                  | 2,307     |
| 6  | 4 OR 5                                                                                                                                                                                                                  | 6,063     |
| 7  | 6 limited to UK                                                                                                                                                                                                         | 298       |
| 8  | 7 limited to Human                                                                                                                                                                                                      | 241       |
| 9  | 8 limited to articles published since 2006                                                                                                                                                                              | 226       |
|    | TOTAL (non-military)                                                                                                                                                                                                    | 226       |
| 10 | <b>Military terms</b><br>Military OR Army OR Armed OR Force* OR Navy OR Naval OR "Air Force" OR Defence* OR Guard OR Soldier OR Sailor OR Aircrew                                                                       | 608,269   |
| 11 | 3 AND 10                                                                                                                                                                                                                | 251       |
| 12 | 6 AND 10                                                                                                                                                                                                                | 43        |
| 13 | 12 limited to Human*                                                                                                                                                                                                    | 43        |
|    | TOTAL (military)                                                                                                                                                                                                        | 43        |
|    | TOTAL (military and non-military)                                                                                                                                                                                       | 269       |

\*Military studies not limited to UK due to lack of data from British Armed Forces, or since 2006 due to limited data from all Armed Forces

| No | PRO-QUEST MILITARY COLLECTION DATABASE SEARCH                                                                                                     | Hits   |
|----|---------------------------------------------------------------------------------------------------------------------------------------------------|--------|
| 1  | <b>Military terms</b><br>Military OR Army OR Armed OR Force* OR Navy OR Naval OR "Air Force" OR Defence* OR Guard OR Soldier OR Sailor OR Aircrew | 19,400 |
| 2  | <b>Breastfeeding terms</b><br>Breast AND (Breastfe* OR Lactati* OR "Nursing Mother" OR Pump* OR "Breast Milk" OR Express*)                        | 5,840  |
| 3  | <b>Employment terms</b><br>Work* OR Employ* OR Occupation* OR Job OR Profession* OR "Return to work" OR "Maternity Leave"                         | 15,500 |
| 4  | 1, 2 AND 3                                                                                                                                        | 20     |
|    | TOTAL (military)                                                                                                                                  | 20     |

\* Access is through the Ministry of Defence and therefore access is only for military articles. Searching in this database is more limited than in other databases.

*SUPPLEMENT 4: Websites used to search for guidance and policies on breastfeeding in the workplace*

**UK Guidance**

www.gov.uk  
sub-search from UK Government website led to:  
www.nhs.uk  
www.acas.org.uk

**HICs' Armed Forces' Policy and Guidance**

DII  
www.mod.uk  
www.army.mod.uk  
www.royalnavy.mod.uk  
www.raf.mod.uk  
www.defence.gov.au  
www.airforce.gov.au  
www.navy.gov.au  
www.army.gov.au  
www.defense.gov  
www.army.mil  
www.airforce.com  
www.navy.mil  
www.forces.gc.ca  
www.navy-marine.forces.gc.ca  
www.army-armee.forces.gc.ca  
www.rcaf-arc.forces.gc.ca  
www.defence.govt.nz  
www.nzdf.mil.nz  
www.army.mil.nz  
www.navy.mi.nz  
www.airforce.mil.nz  
www.military.ie



*SUPPLEMENT 5: Critical Appraisal Scoring Exercise*

| <b>CASP Systematic Review</b>                                                     |                               |
|-----------------------------------------------------------------------------------|-------------------------------|
| Study                                                                             | <b>Croft AMJ<sup>49</sup></b> |
| Did the review address a clearly focussed issue?                                  | 1.0                           |
| Did the authors look for the appropriate sort of papers?                          | 0.5                           |
| Do you think the important, relevant studies were included?                       | 1.0                           |
| Did the review's authors do enough to assess the quality of the included studies? | 0.0                           |
| If the results of the review have been combined, was it reasonable to do so?      | 1.0                           |
| What is the overall result of the review?                                         | 1.0                           |
| How precise are the results?                                                      | 0.0                           |
| Can the results be applied to the local population?                               | 1.0                           |
| Were all important outcomes considered?                                           | 0.5                           |
| Are the benefits worth the harms and costs?                                       | 1.0                           |
| <b>TOTAL</b>                                                                      | <b>7.0</b>                    |
| <b>Total on 0-1 scale</b>                                                         | <b>0.7</b>                    |

| <b>CASP Cohort Study</b>                                                                                                                  |                               |                                |                                |
|-------------------------------------------------------------------------------------------------------------------------------------------|-------------------------------|--------------------------------|--------------------------------|
|                                                                                                                                           | <b>Skafida V<sup>64</sup></b> | <b>Zilawala A<sup>66</sup></b> | <b>Hawkins SS<sup>62</sup></b> |
| Study                                                                                                                                     |                               |                                |                                |
| Did the study address a clearly focused issue?                                                                                            | 1.0                           | 1.0                            | 0.5                            |
| Was the cohort recruited in an acceptable way?                                                                                            | 1.0                           | 1.0                            | 1.0                            |
| Was the exposure accurately measured to minimise bias?                                                                                    | 0.5                           | 0.5                            | 1.0                            |
| Was the outcome accurately measured to minimise bias?                                                                                     | 1.0                           | 0.5                            | 0.5                            |
| Have the authors identified all important confounding factors? Have they taken account of the confounding factors in the design/analysis? | 1.0                           | 1.0                            | 1.0                            |
| Was the follow up of subjects complete enough? Was the follow up of subjects long enough?                                                 | 1.0                           | 1.0                            | 1.0                            |
| What are the results of this study?                                                                                                       | 1.0                           | 1.0                            | 1.0                            |
| How precise are the results?                                                                                                              | 0.5                           | 0.5                            | 0.5                            |
| Do you believe the results?                                                                                                               | 0.5                           | 0.5                            | 1.0                            |
| Can the results be applied to the local population?                                                                                       | 0.5                           | 0.5                            | 1.0                            |
| Do the results of this study fit with other available evidence?                                                                           | 1.0                           | 0.5                            | 1.0                            |
| What are the implications of this study for practice?                                                                                     | 1.0                           | 0.5                            | 1.0                            |
| <b>TOTAL</b>                                                                                                                              | <b>10.0</b>                   | <b>8.5</b>                     | <b>10.5</b>                    |
| <b>Total on 0-1 scale</b>                                                                                                                 | <b>0.8</b>                    | <b>0.7</b>                     | <b>0.9</b>                     |

| STROBE Cross-Sectional Quantitative Study Checklist |                         |                         |                        |                       |                                  |                         |                          |
|-----------------------------------------------------|-------------------------|-------------------------|------------------------|-----------------------|----------------------------------|-------------------------|--------------------------|
| Study                                               | Martin SE <sup>71</sup> | Harlow BA <sup>70</sup> | Uriell Z <sup>75</sup> | Bales K <sup>67</sup> | Kosmala-Anderson J <sup>63</sup> | Stewart K <sup>74</sup> | Wallace LM <sup>65</sup> |
| Title and Abstract                                  | 1.0                     | 0.5                     | 1.0                    | 0.5                   | 1.0                              | 1.0                     | 1.0                      |
| Background and Rationale                            | 1.0                     | 1.0                     | 1.0                    | 0.5                   | 1.0                              | 1.0                     | 1.0                      |
| Objectives                                          | 0.5                     | 0.5                     | 0.5                    | 1.0                   | 0.5                              | 1.0                     | 1.0                      |
| Study Design                                        | 1.0                     | 1.0                     | 1.0                    | 1.0                   | 0.0                              | 1.0                     | 1.0                      |
| Setting                                             | 1.0                     | 1.0                     | 1.0                    | 1.0                   | 0.5                              | 1.0                     | 1.0                      |
| Participants                                        | 1.0                     | 1.0                     | 1.0                    | 1.0                   | 1.0                              | 1.0                     | 0.5                      |
| Variables                                           | 1.0                     | 1.0                     | 1.0                    | 0.0                   | 0.5                              | 1.0                     | 0.5                      |
| Data Sources                                        | 1.0                     | 1.0                     | 1.0                    | 0.5                   | 0.5                              | 0.5                     | 0.5                      |
| Bias                                                | 0.5                     | 0.5                     | 1.0                    | 1.0                   | 0.0                              | 1.0                     | 0.5                      |
| Study Size                                          | 1.0                     | 1.0                     | 1.0                    | 1.0                   | 1.0                              | 1.0                     | 1.0                      |
| Quantitative Variables                              | 1.0                     | 1.0                     | 1.0                    | 0.5                   | 0.5                              | 1.0                     | 0.5                      |
| Statistical methods                                 | 1.0                     | 1.0                     | 1.0                    | 0.0                   | 0.5                              | 1.0                     | 0.0                      |
| Participants                                        | 1.0                     | 1.0                     | 0.5                    | 1.0                   | 0.5                              | 1.0                     | 1.0                      |
| Descriptive data                                    | 0.5                     | 1.0                     | 1.0                    | 0.0                   | 0.5                              | 0.5                     | 0.5                      |
| Outcome Data                                        | 1.0                     | 1.0                     | 1.0                    | 1.0                   | 1.0                              | 1.0                     | 0.5                      |
| Other Analyses                                      | 0.5                     | 1.0                     | 1.0                    | 0.5                   | 0.5                              | 0.5                     | 0.5                      |
| Key Results                                         | 0.5                     | 1.0                     | 1.0                    | 1.0                   | 1.0                              | 1.0                     | 1.0                      |
| Limitations                                         | 0.0                     | 1.0                     | 1.0                    | 1.0                   | 1.0                              | 1.0                     | 1.0                      |
| Interpretation                                      | 1.0                     | 1.0                     | 1.0                    | 1.0                   | 1.0                              | 1.0                     | 0.5                      |
| Generalisability                                    | 0.5                     | 0.5                     | 1.0                    | 1.0                   | 1.0                              | 1.0                     | 0.5                      |
| Funding                                             | 1.0                     | 1.0                     | 0.0                    | 1.0                   | 0.0                              | 1.0                     | 0.5                      |
| <b>TOTAL</b>                                        | <b>17.0</b>             | <b>19.0</b>             | <b>19.0</b>            | <b>15.5</b>           | <b>13.5</b>                      | <b>19.5</b>             | <b>14.5</b>              |
| <b>Total on 0-1 scale</b>                           | <b>0.8</b>              | <b>0.9</b>              | <b>0.9</b>             | <b>0.7</b>            | <b>0.6</b>                       | <b>0.9</b>              | <b>0.7</b>               |

| CASP Qualitative Study                                                               |                          |                          |                          |                       |                         |
|--------------------------------------------------------------------------------------|--------------------------|--------------------------|--------------------------|-----------------------|-------------------------|
| Study                                                                                | Bristow MK <sup>69</sup> | Sleutel MR <sup>74</sup> | Stevens KV <sup>73</sup> | Bell MR <sup>68</sup> | Gatrel CJ <sup>61</sup> |
| Was there a clear statement of the aims of the research?                             | 1.0                      | 0.5                      | 1.0                      | 1.0                   | 0.5                     |
| Is a qualitative methodology appropriate?                                            | 1.0                      | 1.0                      | 1.0                      | 0.5                   | 1.0                     |
| Was the research design appropriate to address the aims of the research?             | 0.5                      | 0.5                      | 0.5                      | 1.0                   | 1.0                     |
| Was the recruitment strategy appropriate to the aims of the research?                | 0.5                      | 0.0                      | 0.5                      | 0.5                   | 0.5                     |
| Was the data collected in a way that addressed the research issue?                   | 1.0                      | 0.5                      | 1.0                      | 1.0                   | 1.0                     |
| Has the relationship between researcher and participants been adequately considered? | 1.0                      | 0.0                      | 0.0                      | 0.5                   | 0.5                     |
| Have ethical issues been taken into consideration?                                   | 1.0                      | 0.0                      | 0.0                      | 0.0                   | 1.0                     |
| Was the data analysis sufficiently rigorous?                                         | 1.0                      | 0.5                      | 0.5                      | 0.0                   | 1.0                     |
| Is there a clear statement of findings?                                              | 0.5                      | 0.5                      | 1.0                      | 0.5                   | 0.5                     |
| How valuable is the research?                                                        | 0.5                      | 0.5                      | 1.0                      | 0.5                   | 1.0                     |
| <b>TOTAL</b>                                                                         | <b>8.0</b>               | <b>4.0</b>               | <b>6.5</b>               | <b>5.5</b>            | <b>8.0</b>              |
| <b>Total on 0-1 scale</b>                                                            | <b>0.8</b>               | <b>0.4</b>               | <b>0.7</b>               | <b>0.6</b>            | <b>0.8</b>              |
